# Supplementary material for: A novel transcriptional regulator of L-arabinose utilization in human gut bacteria
Source: PubMed Central journal article supplement (PMC4666351; doi:10.1093/nar/gkv1005), 2015-10-04

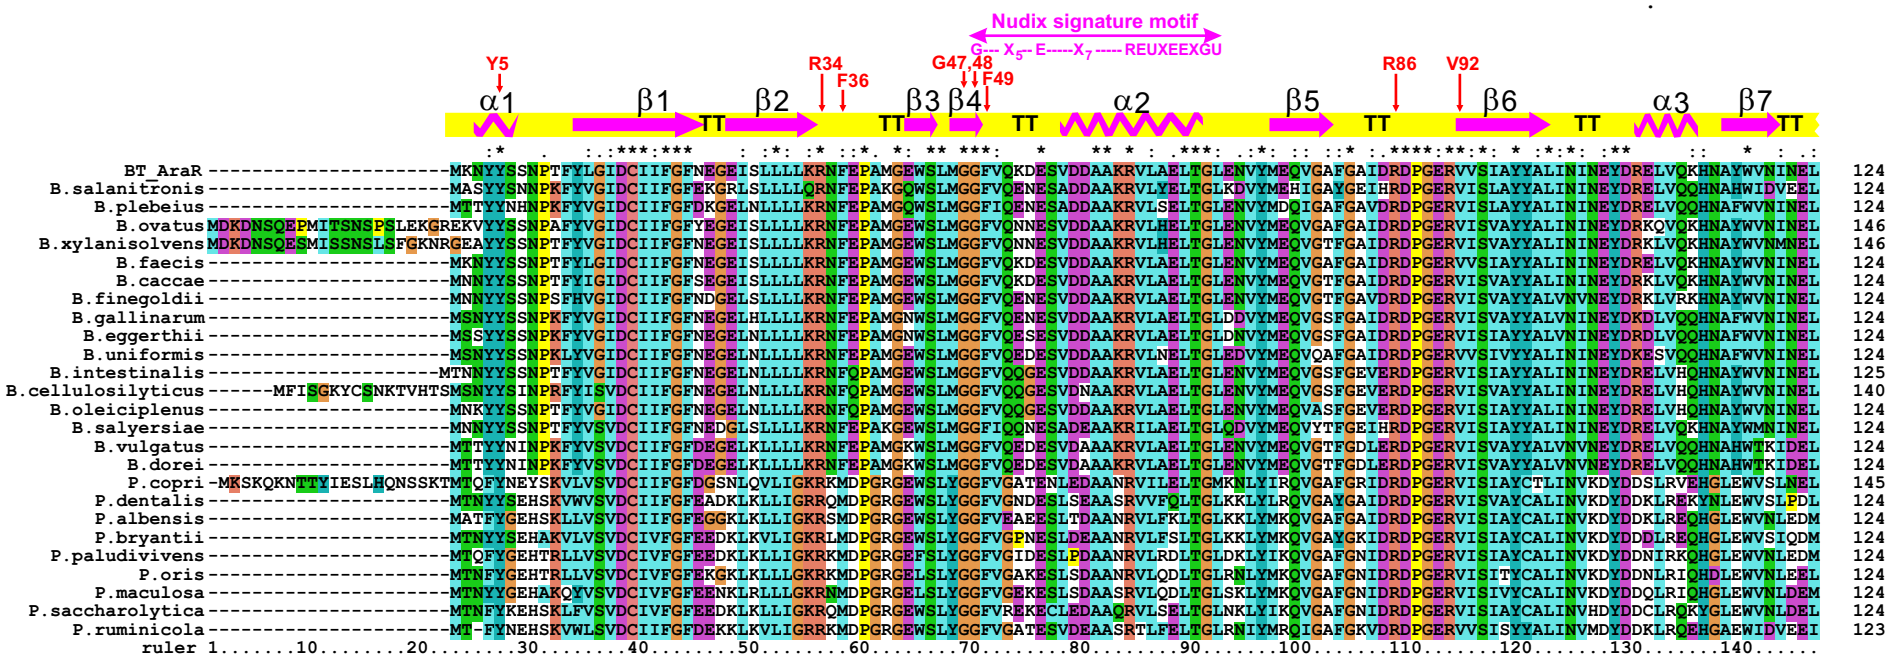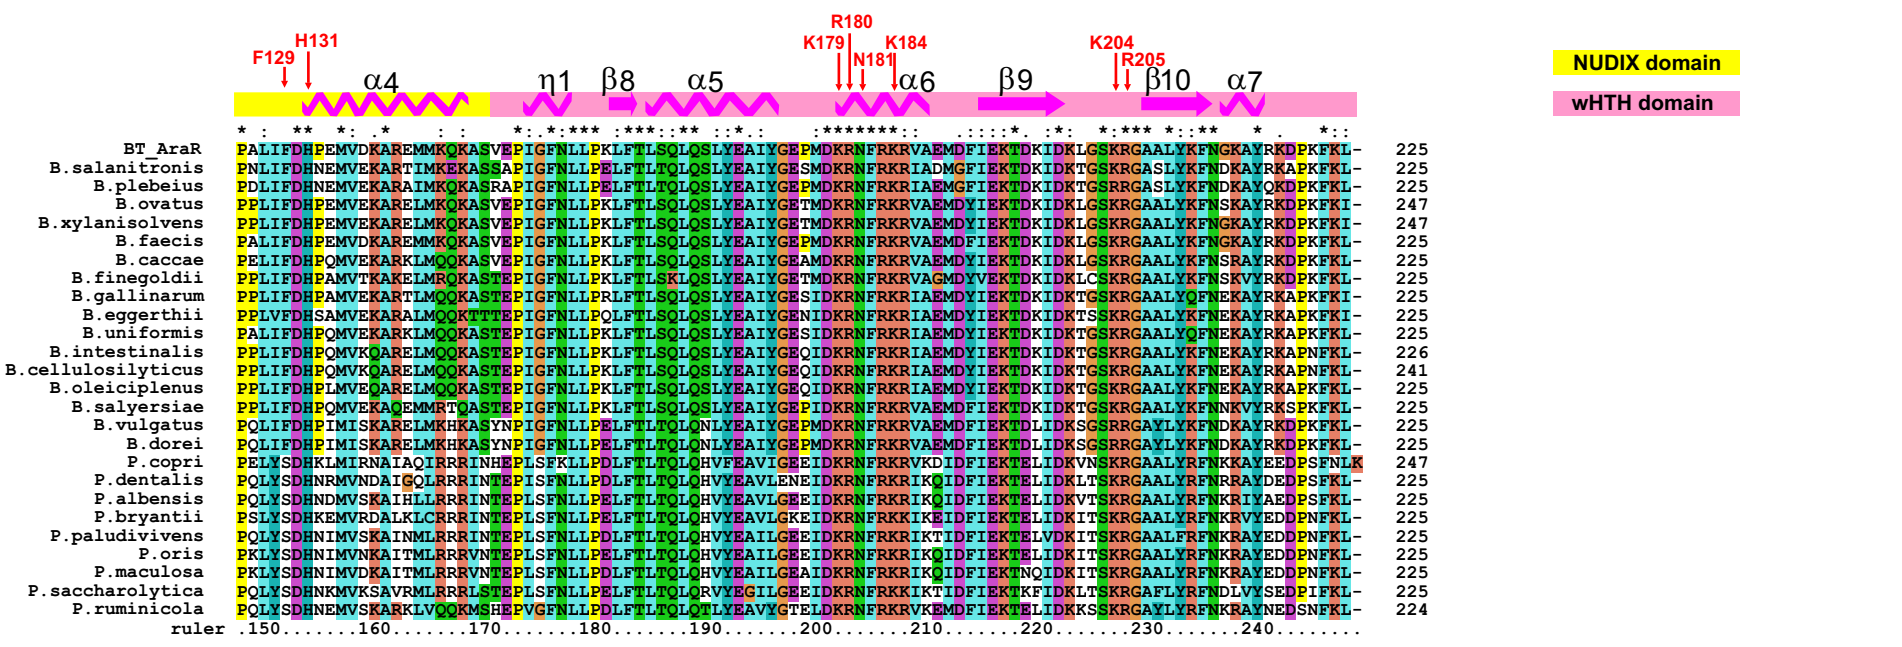

Supplement: supp_gkv1005_nar-02513-h-2015-File009.pdf [file supp_gkv1005_nar-02513-h-2015-File009.pdf]
