# Supplementary material for: A novel transcriptional regulator of L-arabinose utilization in human gut bacteria
Source: PubMed Central journal article supplement (PMC4666351; doi:10.1093/nar/gkv1005), 2015-10-04
Supplement: supp_gkv1005_nar-02513-h-2015-File015.pdf [file supp_gkv1005_nar-02513-h-2015-File015.pdf]

**Table S1. Candidate AraR-binding sites in the genomes of *Bacteroides* and *Prevotella* spp.**

| Genome / Target gene                                 | Site position | Site score | AraR locus tag / AraR site | Regulated operon              | Other regulators |
|------------------------------------------------------|---------------|------------|----------------------------|-------------------------------|------------------|
| <b><i>Bacteroides thetaiotaomicron</i> VPI-548</b>   |               |            |                            |                               |                  |
| <b>BT0354</b>                                        |               |            |                            |                               |                  |
| BT0356                                               | -83           | 5.64       | AgAGTGTAttTGaTACACcaa      | araMPRDAB-X-abf3              |                  |
|                                                      | -59           | 5.85       | AAAGTGTtACTtTTACACcca      |                               |                  |
| BT0365                                               | -166          | 5.5        | AAAGTGTAaAaagACACTTa       | X-susCD-susCD-abn1            | HTCS-Ara-1       |
| BT3047                                               | -228          | 5.04       | AtAaTGTAaAAtcTACACTca      | X-susCD-X                     | HTCS-Ara-2       |
| BT4163                                               | -330          | 4.96       | AAAtTGTAttAtcTACACTcT      | X-susCD-XX-susCD-pelL-X       | HTCS-Rgu-2       |
| <b><i>Bacteroides ovatus</i> ATCC 8483</b>           |               |            |                            |                               |                  |
| <b>BACOVA_01713</b>                                  |               |            |                            |                               |                  |
| BACOVA_01715                                         | -83           | 5.64       | AgAGTGTAttTGaTACACcaa      | araMPRDAB-X-abf3              |                  |
|                                                      | -59           | 5.85       | AAAGTGTtACTtTTACACcca      |                               |                  |
| BACOVA_03483                                         | -139          | 5.09       | AAAGTGTaTaTtTTACcCTTg      | abf3-agaL                     |                  |
| <b><i>Bacteroides cellulosilyticus</i> DSM 14838</b> |               |            |                            |                               |                  |
| <b>BACCELL_05606</b>                                 |               |            |                            |                               |                  |
| BACCELL_05604                                        | -85           | 5.5        | cAAGTGTtACTaaTACACTca      | araMPRDAB-X-abf3              |                  |
|                                                      | -61           | 5.85       | AAAGTGTtACTtTTACACcca      |                               |                  |
| BACCELL_00858                                        | -40           | 4.81       | tAtGTGTAttTtTgACACcca      | abn3-agaL-abf3-abf4-bgaL-abn4 |                  |
| <b><i>Bacteroides cellulosilyticus</i> WH2</b>       |               |            |                            |                               |                  |
| <b>BACWH2_0841</b>                                   |               |            |                            |                               |                  |
| BACWH2_0839                                          | -85           | 5.19       | cAAGTGTAgTaaTACACTca       | araMPRDAB-X-abf3              |                  |
|                                                      | -61           | 5.85       | AAAGTGTtACTtTTACACcca      |                               |                  |
| BACWH2_0835                                          | -358          | 4.98       | AAAaTGTAAttTtcTACACTTa     | susCD-X-abn1                  | HTCS-Ara-1       |
| BACWH2_1534                                          | -37           | 4.81       | tAtGTGTAttTtTgACACcca      | abn3-agaL-abf3-abf4-bgaL-abn4 |                  |
| <b><i>Bacteroides caccae</i> ATCC 43185</b>          |               |            |                            |                               |                  |
| <b>BACCAC_02303</b>                                  |               |            |                            |                               |                  |
| BACCAC_02305                                         | -83           | 5.64       | AgAGTGTAttTGaTACACcaa      | araMPRDAB                     |                  |
|                                                      | -59           | 5.85       | AAAGTGTtACTtTTACACcca      |                               |                  |
| <b><i>Bacteroides dorei</i> DSM 17855</b>            |               |            |                            |                               |                  |
| <b>BACDOR_03632</b>                                  |               |            |                            |                               |                  |
| BACDOR_03634                                         | -121          | 5.38       | AAAGTGTAggAaaTACACTTT      | araMPRDAB                     |                  |
|                                                      | -58           | 5.79       | AtAGTGTtACTtTTACACcca      |                               |                  |
| <b><i>Bacteroides eggerthii</i> DSM 20697</b>        |               |            |                            |                               |                  |
| <b>BACEGG_01534</b>                                  |               |            |                            |                               |                  |
| BACEGG_01536                                         | -83           | 5.74       | AAAGTGTaTaTtTTACACcaa      | araMPRDAB-X-abf3              |                  |
|                                                      | -59           | 5.58       | AAAGTGTtACTtTTACACccg      |                               |                  |
| BACEGG_00165                                         | -47           | 5.77       | AAgGTGTtAtTtTTACACTcT      | agaL                          |                  |
| <b><i>Bacteroides faecis</i> MAJ27</b>               |               |            |                            |                               |                  |
| <b>KCYDRAFT_02805</b>                                |               |            |                            |                               |                  |
| KCYDRAFT_02807                                       | -83           | 5.39       | cAAGTGTAttTGaTACACcaa      | araMPRDAB-X-abf3              |                  |
|                                                      | -59           | 5.85       | AAAGTGTtACTtTTACACcca      |                               |                  |
| KCYDRAFT_02813                                       | -166          | 5.01       | gAAGTGTAaAaagACACTTa       | X-susCD-susCD-abn1            | HTCS-Ara-1       |
| <b><i>Bacteroides finegoldii</i> DSM 17565</b>       |               |            |                            |                               |                  |
| <b>BACFIN_07055</b>                                  |               |            |                            |                               |                  |
| BACFIN_07057                                         | -59           | 5.58       | AAAGTGTtACTtTTACACccg      | araMPRDAB-X-abf3              |                  |

|                                           |      |                         |                         |                               |            |
|-------------------------------------------|------|-------------------------|-------------------------|-------------------------------|------------|
| <b>Bacteroides gallinarum DSM 18171</b>   |      | <b>C233DRAFT_02383</b>  |                         |                               |            |
| C233DRAFT_02381                           | -85  | 5.84                    | AAAGTGTAtaTaTTACACTaa   | araMPRDAB-X-abf3              |            |
|                                           | -61  | 5.58                    | AAAGTGTtACTtTTACACccg   |                               |            |
| C233DRAFT_02377                           | -358 | 5.01                    | AAAcTGTActTtTTACACTTa   | susCD-X-abn1                  | HTCS-Ara-1 |
| C233DRAFT_03386                           | -364 | 5.58                    | AAAGTGTtAtTtTTACACTcg   | agaL                          |            |
| <b>Bacteroides intestinalis DSM 17393</b> |      | <b>BACINT_02780</b>     |                         |                               |            |
| BACINT_02778                              | -85  | 5.29                    | cAAGTGTAgCTaaTACACTca   | araMPRDAB-XX-abf3             |            |
|                                           | -61  | 5.85                    | AAAGTGTtACTtTTACACcca   |                               |            |
| BACINT_02771                              | -150 | 4.85                    | tAAtTGTAAtTtTcACACTTa   | X-susCD-susCD-abn1            | HTCS-Ara-1 |
| BACINT_00345                              | -38  | 4.81                    | tAtGtGTAttTtTgACACcca   | abn3-agaL-abf3-abf4-bgaL-abn4 |            |
| BACINT_03575                              | -116 | 4.75                    | tgAGTGTAttTcaaACAaTaa   | abf5                          |            |
| <b>Bacteroides oleiciplenus YIT 12058</b> |      | <b>HMPREF9447_03620</b> |                         |                               |            |
| HMPREF9447_03618                          | -85  | 5.03                    | gtAGTGTAgCTaaTACACTca   | araMPRDAB-X-abf3              |            |
|                                           | -61  | 5.85                    | AAAGTGTtACTtTTACACcca   |                               |            |
| HMPREF9447_03611                          | -153 | 4.74                    | tAAtTGTAgtTtcTACACTTa   | X-susCD-susCD-abn1            | HTCS-Ara-1 |
| HMPREF9447_03041                          | -47  | 5.42                    | gAAGTGTtAtTtTTACACTTT   | abn3-agaL-abf3-abf4-bgaL-abn4 |            |
| <b>Bacteroides plebeius DSM 17135</b>     |      | <b>BACPLE_02213</b>     |                         |                               |            |
| BACPLE_02214                              | -44  | 5.83                    | tAAGTGTtACTtTTACACcaT   | araMRDAB                      |            |
| BACPLE_02216                              | -93  | 5.77                    | ttAGTGTtACTaaTACACTTT   | araP                          |            |
| BACPLE_03732                              | -60  | 4.8                     | tAgtTGTAtgTGaTACACcaa   | abn3-abf3                     |            |
| <b>Bacteroides salanitronis DSM 18170</b> |      | <b>Bacsa_0720</b>       |                         |                               |            |
| Bacsa_0722                                | -97  | 5.15                    | ttAGTGTAgAgaTagTACACTaa | araPMRDAB-abf3-abf2           |            |
| <b>Bacteroides salyersiae CL02T12C01</b>  |      | <b>HMPREF1071_02469</b> |                         |                               |            |
| HMPREF1071_02471                          | -83  | 5.84                    | AAAGTGTAAAtAtTTACACcaa  | araMPRDAB                     |            |
|                                           | -59  | 5.85                    | AAAGTGTtACTtTTACACcca   |                               |            |
| <b>Bacteroides uniformis ATCC 8492</b>    |      | <b>BACUNI_01359</b>     |                         |                               |            |
| BACUNI_03327                              | -97  | 4.92                    | tAAGTGTAtaTGTTACACaac   | abn3-agaL-abf3-X-abf4-bgaL    |            |
|                                           | -47  | 5.48                    | AtAGTGTtAaTtTTACACccg   |                               |            |
| BACUNI_01357                              | -28  | 4.71                    | AAAGTGTAcagccTACACTaa   | araMPRDAB                     |            |
|                                           | -4   | 5.85                    | AAAGTGTtACTtTTACACcca   |                               |            |
| <b>Bacteroides vulgatus ATCC 8482</b>     |      | <b>BVU_2322</b>         |                         |                               |            |
| BVU_2324                                  | -121 | 5.38                    | AAAGTGTAggAaaTACACTTT   | araMPRDAB                     |            |
|                                           | -58  | 5.77                    | AtAGTGTtACTtTTACACcaa   |                               |            |
| <b>Bacteroides xylanisolvens XB1A</b>     |      | <b>BXY_15620</b>        |                         |                               |            |
| BXY_15640                                 | -83  | 5.64                    | AgAGTGTAttTGaTACACcaa   | araMPRDAB-X-abf3              |            |
|                                           | -59  | 5.85                    | AAAGTGTtACTtTTACACcca   |                               |            |
| BXY_15680                                 | -153 | 5.2                     | AAgcTGTAttTtTTACACTTa   | susCD-X-abn1                  | HTCS-Ara-1 |

|                                                        |      |                             |                |
|--------------------------------------------------------|------|-----------------------------|----------------|
| BXY_29680                                              | -139 | 5.09 AAAGTGTAtaTtTTACcCTTg  | abf3-agaL      |
| <b>Prevotella albensis DSM 11370</b>                   |      | <b>K333DRAFT_01610</b>      |                |
| K333DRAFT_01608                                        |      | 6.32 AAaGTGTtAAAtTTtACACcTT | araMPRDAB-abf3 |
| <b>Prevotella paludivivens DSM 17968</b>               |      | <b>B045DRAFT_01160</b>      |                |
| B045DRAFT_01162                                        |      | 6.5 AAAGTGTtAAAtTTtACACTTT  | araMPRDAB-abf3 |
| <b>Prevotella bryantii C21a</b>                        |      | <b>G638DRAFT_00205</b>      |                |
| G638DRAFT_00203                                        |      | 5.85 aAAGTGTtaaaaagACACTTc  | araMPRDAB-abf3 |
| <b>Prevotella oris DSM 18711</b>                       |      | <b>D468DRAFT_01535</b>      |                |
| D468DRAFT_01533                                        |      | 5.82 aaAGTGTtaAtTagACACTca  | araMPRDAB-abf3 |
| <b>Prevotella copri CB7, DSM 18205</b>                 |      | <b>PREVCOP_04057</b>        |                |
| PREVCOP_04055                                          |      | 5.76 AtAGTGTtaaaaagACACTtT  | araMPRDAB-abf3 |
| <b>Prevotella saccharolytica JCM 17484</b>             |      | <b>JCM17484DRAFT_02107</b>  |                |
| JCM17484DRAFT_02105                                    |      | 5.66 aAaGTGgtAAAtTTtaCACcTa | araMPRDAB-abf3 |
| <b>Prevotella ruminicola 23</b>                        |      | <b>PRU_0422</b>             |                |
| PRU_0424                                               |      | 5.65 AAGGTGTgttttttACACCTT  | araMPRDAB-abf3 |
| <b>Prevotella dentalis DSM 3688</b>                    |      | <b>HMPREF9136_1913</b>      |                |
| HMPREF9136_1911                                        |      | 5.61 AAAGtGTgaaaaatACcCTTT  | araMPRDAB-abf3 |
| <b>Prevotella maculosa DSM 19339</b>                   |      | <b>H164DRAFT_00687</b>      |                |
| H164DRAFT_00685                                        |      | 5.45 aAagTGTtAAtTaAACAtgTa  | araMPRDAB-abf3 |
| <b>Prevotella multisaccharivorax PPPA20, DSM 17128</b> |      | <b>Premu_2666</b>           |                |
| Premu_2668                                             |      | 5.08 aGaGTGTtaaaaatACACaCc  | araMPRDAB-abf3 |

BACUNI\_01357
